# Supplementary material for: Exploring the elusive composition of corpora amylacea of human brain
Source: PubMed Central journal article supplement (PMC6131176; doi:10.1038/s41598-018-31766-y), 2018-09-10

# **Exploring the elusive composition of *corpora amylacea* of human brain**

Elisabet Augé, Jordi Duran, Joan J. Guinovart, Carme  
Pelegrí, Jordi Vilaplana

*Supplementary information, Figure S1*

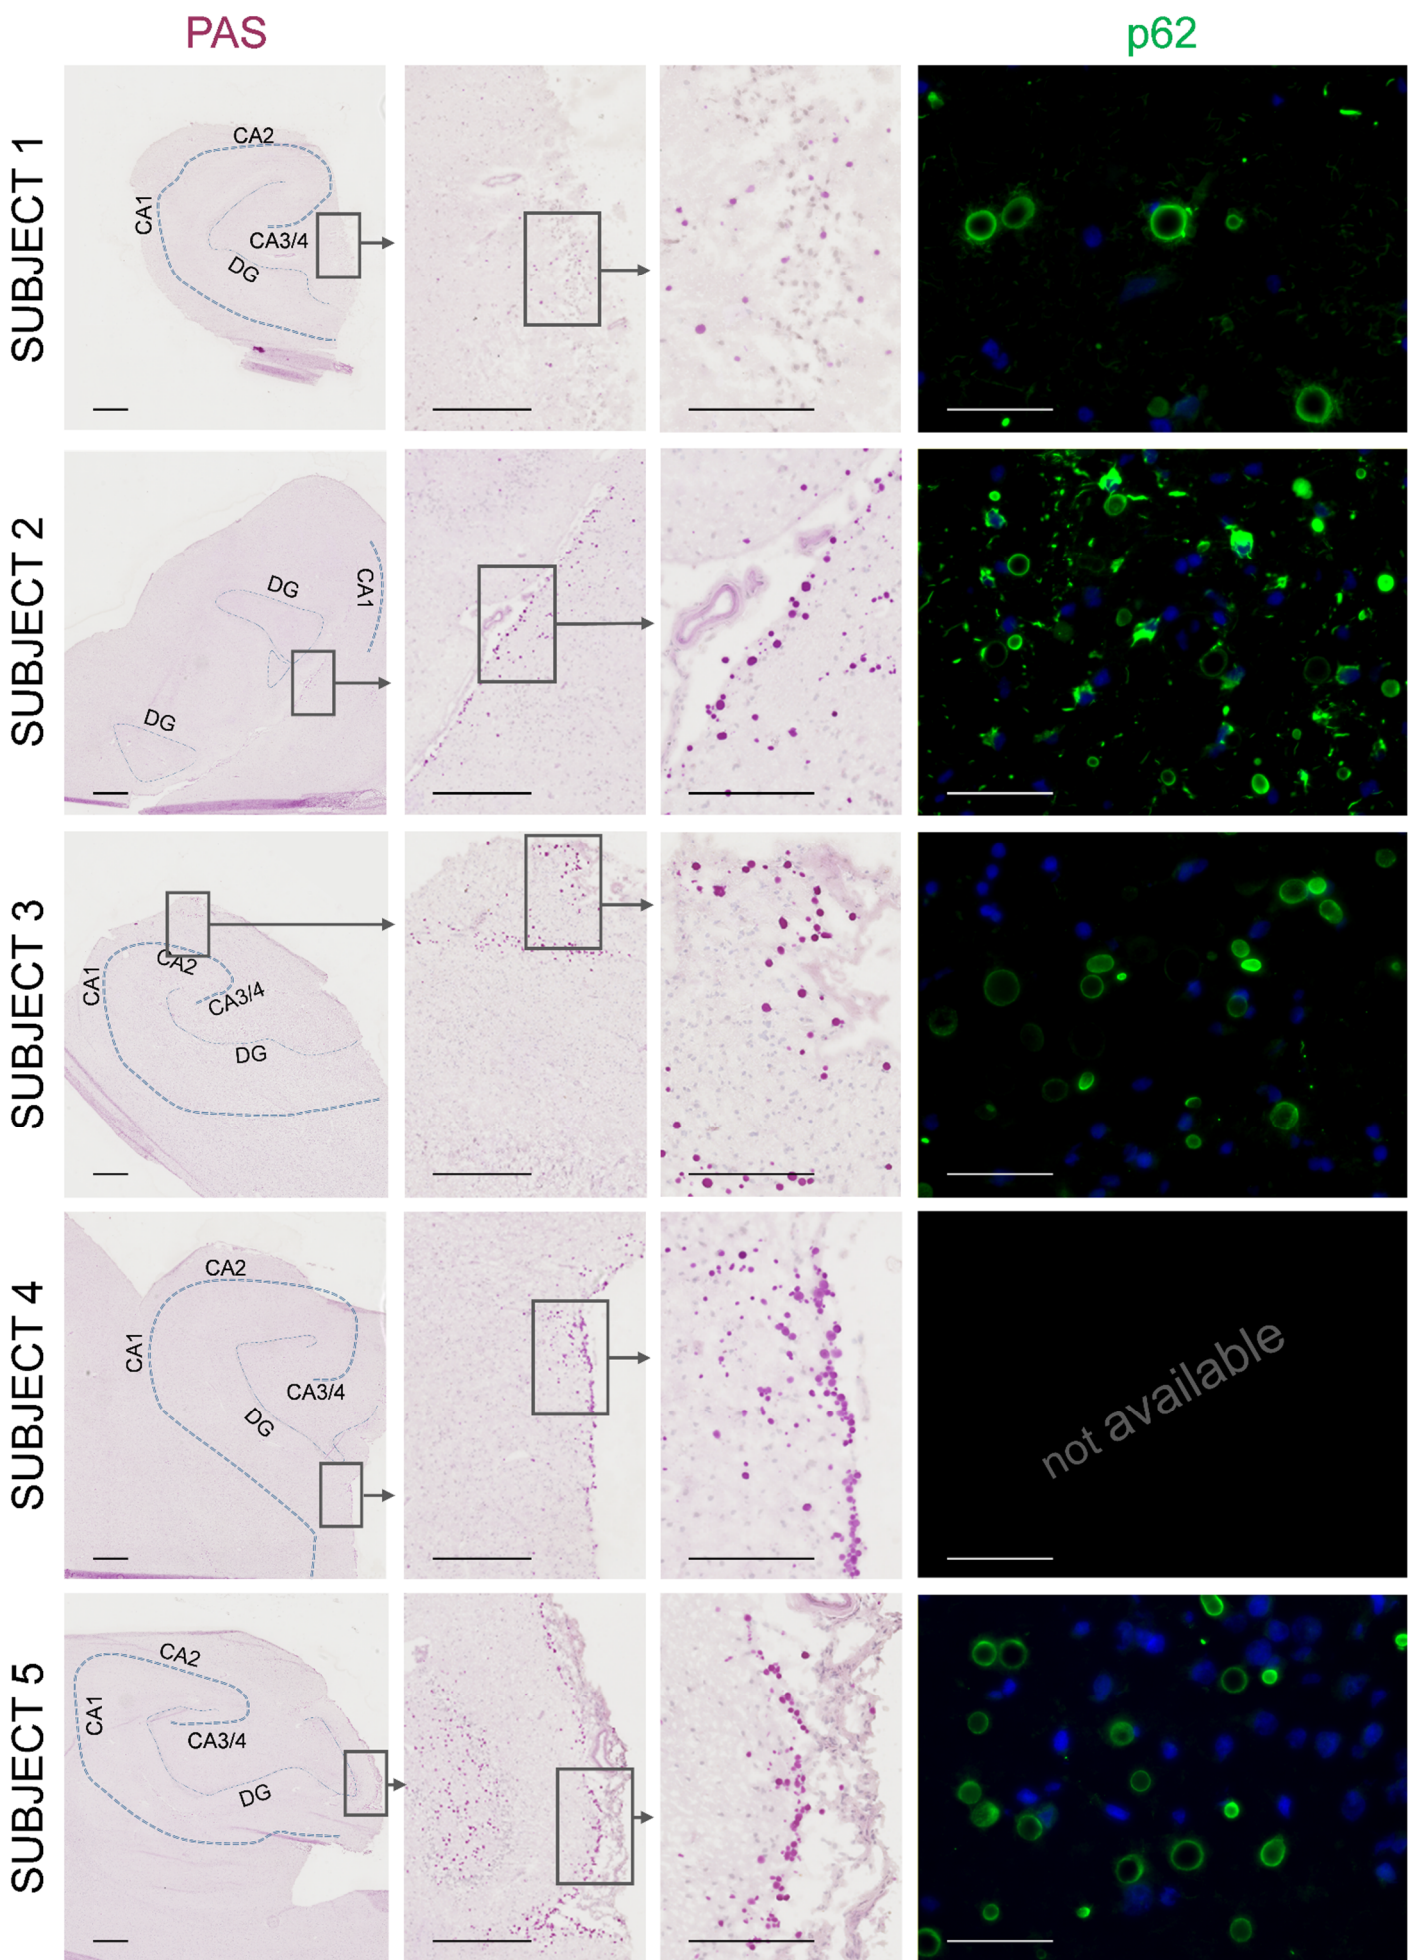

Supplement: 41598_2018_31766_MOESM5_ESM.pdf [file 41598_2018_31766_MOESM5_ESM.pdf]
